1 ***Mycobacterium tuberculosis* inhibits autocrine type I interferon signaling to increase**  
2 **intracellular survival.**

3  
4 **Running title: Mtb inhibits type I IFN receptor signaling**

5  
6 Dallas A. Banks<sup>a</sup>, Sarah E. Ahlbrand<sup>a</sup>, V. Keith Hughitt<sup>a,b</sup>, Swati Shah<sup>a</sup>, Stefanie N. Vogel<sup>c</sup>,  
7 Najib M. El-Sayed<sup>a,b</sup>, and Volker Briken<sup>a,#</sup>

8  
9  
10 a-Department of Cell Biology and Molecular Genetics, University of Maryland, College Park,  
11 Maryland, USA

12 b-Center for Bioinformatics and Computational Biology, University of Maryland, College Park,  
13 Maryland, USA

14 c-Department of Microbiology and Immunology, University of Maryland School of Medicine,  
15 Baltimore, Maryland, USA

16 D. A. Banks and S. E. Ahlbrand contributed equally.

17 # corresponding author: vbriken@umd.edu

18

19

20 **Summary**

21

22 The type I interferons (IFN- $\alpha$  and - $\beta$ ) are important for host defense against viral infections. In  
23 contrast, their role in defense against non-viral pathogens is more ambiguous. Here we report  
24 that IFN- $\beta$ -signaling in macrophages has protective capacity against *Mycobacterium*  
25 *tuberculosis* (Mtb) via the increased production of nitric oxide. Furthermore, Mtb is able to  
26 inhibit IFN- $\alpha/\beta$ -receptor-mediated cell signaling and the transcription of 309 IFN- $\beta$  stimulated  
27 genes which includes genes associated with innate host cell defense. The molecular  
28 mechanism of inhibition by Mtb involves reduced phosphorylation of the IFNAR-associated  
29 protein kinases JAK1 and TYK2 leading to reduced phosphorylation of the downstream targets  
30 STAT1 and STAT2. Overall, our study supports the novel concept that Mtb evolved to inhibit  
31 autocrine type I IFN signaling in order to evade host defense mechanisms.

32

33

## 34 **Introduction**

35

36 Type I interferons (IFNs) are innate cytokines that are best known for their ability to induce an  
37 anti-viral state in cells (1, 2). Upon binding to their shared receptor, type I IFN receptor  
38 (IFNAR), a heterodimer composed of IFNAR1 and IFNAR2 transmembrane proteins, the  
39 receptor-associated tyrosine kinases JAK1 and TYK2 are activated, this leads to the  
40 phosphorylation and activation of STAT1 and STAT2. Activated STAT1 can homodimerize,  
41 translocated to the nucleus and bind to IFN- $\gamma$ -activated sites (GAS) to promote gene  
42 transcription of IFN stimulated genes (ISGs). Alternatively, STAT1 will associate with STAT2  
43 and IRF-9 to form the transcription factor ISGF3 which then translocates to the nucleus to bind  
44 to IFN-stimulated response elements (ISRE) of ISG and induce their expression (3, 4).

45

46 While type I IFNs clearly have a protective function during viral infection, the role of these  
47 cytokines during bacterial or protozoan infections is more ambiguous (2, 4-6). IFN- $\beta$  is  
48 detrimental to the host during *Mycobacterium tuberculosis* (Mtb) infections. (7-16) Despite the  
49 various outcomes of the type I IFN response to infection it is well documented that many  
50 intracellular, non-viral pathogens elicit a host response that leads to the increase in IFN- $\beta$   
51 production (2, 4, 5). Multiple cell-surface (Toll-like receptors) and intracellular (e.g., retinoic  
52 acid inducible gene I) receptors recognize microbial products and initiate signaling pathways  
53 that activate IRF3, IRF7 or AP1 to induce transcription of type I IFN genes (2, 4, 5). In  
54 particular, Mtb gains access to the host cell cytosol via their ESX-1 type VII secretion system,  
55 where secreted bacterial DNA (eDNA) binds to the cyclic GMP-AMP (cGAMP) synthase  
56 (cGAS) that subsequently activates the STING/TBK1/IRF3 pathway leading to the increased

57 transcription of type I IFNs genes (17-21). The secretion of bacterial c-di-AMP can also  
58 mediate the cGAS-independent activation of the STING pathway (22, 23). Finally, Mtb can  
59 induce IFN- $\beta$  production through mitochondrial stress and subsequent release of mitochondrial  
60 DNA (mtDNA) which activates the STING pathway (24).

61

62 The potential of non-viral pathogens to inhibit cell signaling via the IFNAR has not been  
63 studied in great detail. One reason for this is probably that the infected host cell detects the  
64 pathogen and responds by increased synthesis of IFN- $\beta$  which confounds the analysis. In  
65 order to overcome this problem, we used bone marrow-derived macrophages (BMDM) from  
66 *Ifn $\beta$ <sup>-/-</sup>* knock-out mice and investigated the effect of IFN- $\beta$  on survival of Mtb and the capacity of  
67 Mtb to inhibit IFNAR-mediated cell signaling.

68

## 69 **Materials and Methods**

70

### 71 **Cell Culture and Mice**

72 *Ifn-β*<sup>-/-</sup> mice were originally obtained by Dr. E. Fish (University of Toronto) and are described in  
73 (25). C57BL/6J and *Nos2*<sup>-/-</sup> mice were obtained from The Jackson Laboratory. All animal  
74 studies were approved by the IACUC and were conducted in accordance with the National  
75 Institutes of Health. Bone marrow-derived macrophages (BMDMs) were prepared from bone  
76 marrow cells flushed from the femurs and tibia of mice that were cultured in DMEM  
77 supplemented with 10% heat-inactivated FCS, 1% penicillin/streptomycin, and either 20%  
78 L929 supernatant for BMDMs during a period of 6 days prior to infection. The Raw264.7-  
79 derived, *Irf-3* deficient and IFNAR-signaling reporter cell line (RAW-Lucia™ ISG-KO-IRF3) is  
80 commercially available, and measurement of reporter activity was performed according to  
81 manufacturer's protocol (Invivogen).

82

### 83 **Ethics statement**

84 All animals were handled in accordance with the NIH guidelines for housing and care of  
85 laboratory animals and the studies were approved by the Institutional Animal Care and Use  
86 Committee at the University of Maryland (RJAN1702).

87

### 88 **Bacteria**

89 *M. smegmatis* (mc<sup>2</sup>155), *M. bovis* BCG-Pasteur and *M. tuberculosis* H37Rv (ATCC 25618)  
90 strains were obtained from Dr. W. R. Jacobs Jr. (AECOM). *M. kansasii* strain Hauduroy  
91 (ATCC 12478) was obtained from ATCC. Bacterial strains were grown in 7H9 media

92 supplemented with 10% ADC, 0.5% glycerol and 0.05% Tween 80. Hygromycin (50 µg/ml) and  
93 kanamycin (40 µg/ml) were added to the mutant and complemented strain cultures,  
94 respectively.

95

### 96 ***Mycobacterium tuberculosis* (Mtb) ex vivo Infection**

97 Bacterial infections of BMDMs were performed as previously described (26). After infection  
98 cells were incubated in media containing 100 µg/mL gentamicin in the absence or presence of  
99 IFN-β or IFN-γ (Peprotech). For assays using the RAW-Lucia™ ISG-KO-IRF3 reporter cell line,  
100 cells were infected at MOI 10 and stimulated with the indicated amount of IFN-β. For  
101 measurement of bacterial survival in macrophages, a total of 0.5 million *Ifn-β*<sup>-/-</sup>, *Nos2*<sup>-/-</sup>,  
102 C57BL/6J BMDMs were seeded in 24-well plates and infected with Mtb H37Rv at MOI of 3.  
103 Selected BMDMs were then treated with 1000 pg/mL IFN-β twice a day for a total of four days.  
104 Cells were lysed at indicated timepoints with 0.1% Triton X-100 in PBS, and serial dilutions  
105 were plated on 7H11 agar plates (Difco). Colony forming units (CFUs) were counted after 15-  
106 20 days of incubation at 37°C.

107

### 108 **Transwell infections**

109 6-well transwells with a 0.4µM membrane (Corning) were allowed to equilibrate in medium  
110 overnight before seeding cells. 3x10<sup>6</sup> *Ifnβ*<sup>-/-</sup> BMDMs were seeded into the upper transwell  
111 and 3x10<sup>6</sup> RAW-Lucia™ ISG-KO-IRF3 cells were seeded in the lower transwell. Infections  
112 were performed as described earlier in the upper transwell. Selected conditions were then  
113 treated with 200pg/mL IFN-β in the upper and lower transwell for the indicated timepoints.

114

## 115 **Western blot analysis**

116 Whole cell lysates were obtained by lysing cells with RIPA buffer containing protease and  
117 phosphatase inhibitor cocktails (Roche). Protein concentration was measured using the Pierce  
118 BCA protein assay kit (Thermo Scientific) and proteins were subjected to SDS-PAGE followed  
119 by immunoblotting as described (26). Antibodies were detected binding using SuperSignal  
120 West Femto chemiluminescent substrate (Thermo Fisher; 34095) and images were acquired  
121 using the LAS-300 imaging system (Fuji). All Western blots were performed at least 3 times  
122 and the image of one representative result is shown. ImageJ software (NIH) was used for  
123 densitometry quantification as described in figure legends for each Western blot.

124

125

## 126 **Flow Cytometry**

127 After infection, BMDMs were blocked with 5% FCS and rat anti-mouse CD16/CD32 Fc Block  
128 (BD Biosciences, 553141) for 15 min followed by incubation with either PE-conjugated mouse  
129 anti-IFNAR1 (Biolegend, 127311) or PE-conjugated goat anti-IFNAR2 (R&D Systems,  
130 FAB1083P) for 30 min on ice. PE-conjugated mouse IgG1 (Biolegend, 400111) and goat IgG1  
131 (R&D Systems, IC108P) were used as isotype controls. Protein levels were quantified by  
132 acquiring 25,000 cells using the Accuri C6 flow cytometer and software (BD Biosciences).  
133 Histograms were processed using FlowJo software version 10 (BD Biosciences).

134

## 135 **Measurement of Nitric Oxide (NO) production**

136 NO production was quantified in cell culture supernatants by the Griess reagent kit which  
137 measure the NO derivate Nitrite (ThermoFisher, G7921) at the indicated timepoints.

138 Absorbance was measured at 548nm using a microplate reader (BioTek). Nitrite concentration  
139 was determined using a sodium nitrite standard curve (0-100  $\mu$ M). Culture supernatants were  
140 pooled from three replicate wells per experiment for all infections. All samples were assayed in  
141 technical duplicates and three independent experiments were performed.

142

### 143 **RNAseq Library Preparation and Analysis**

144 *Ifn- $\beta$* <sup>-/-</sup> BMDMs were infected or not as indicated previously with Mtb H37Rv. At 4 hours post  
145 infection (hpi) cells were lysed with 1 mL Trizol (Ambion). RNA was extracted with chloroform,  
146 precipitated with 100% isopropanol, and washed with 70% ethanol. Purified RNA was treated  
147 with Turbo DNase (Ambion) for 1 hour.

148 RNAseq libraries were prepared using the Illumina ScriptSeq v2 Library Preparation Kit  
149 according to the manufacturer's protocol. Library quality was assayed by Bioanalyzer (Agilent)  
150 and quantified by qPCR (KAPA Biosystems). Sequencing was performed on an Illumina  
151 HiSeq 1500 generating 100bp paired-end reads. RNA-Seq read quality was assessed using  
152 FastQC (<http://www.bioinformatics.babraham.ac.uk/projects/fastqc/>) and low-quality base-pairs  
153 were removed using Trimmomatic (27). The Ensembl *Mus musculus* GRCm38 reference  
154 genome (version 76) was downloaded from the Ensembl website (28) and reads were mapped  
155 to the genome using TopHat2 (29). HTSeq (30) was used to quantify expression as the gene  
156 level. Count tables were loaded into R/Bioconductor (31). log<sub>2</sub>-transformed, counts-per-million  
157 (CPM) and quantile normalized (31), and variance bias was corrected for using Voom (32).  
158 Next, batch adjustment was performed using ComBat (33). We performed Pearson correlation,  
159 Euclidean distance and PCA analyses which revealed the presence of a single outlier Mtb  
160 sample (HPGL0627), which was removed from subsequent analyses (Table S1). The



161 differential gene expression was measured for each of several contrasts: 1) uninfected (UI) vs.  
162 uninfected +IFN- $\beta$  (UI +IFN- $\beta$ ) and 2) Mtb + IFN- $\beta$  vs. UI + IFN- $\beta$  (Table S1). In order to  
163 determine which IFN- $\beta$ -stimulated genes were specifically deregulated during infection with  
164 Mtb, the intersection of the set of genes found to be differentially expressed in both the UI vs.  
165 UI + IFN- $\beta$  and Mtb + IFN- $\beta$  vs. UI + IFN- $\beta$  contrasts was taken (Table S1). All raw RNAseq  
166 data were submitted to SRA and can found at <https://www.ncbi.nlm.nih.gov/sra/SRP130272> .

167

### 168 **Cytokine Measurements**

169 *Ifn- $\beta$ <sup>-/-</sup>* BMDMs were infected as described previously and treated with 50 pg/mL IFN- $\beta$ . An  
170 additional 50 pg/mL of IFN- $\beta$  was added at 3 hpi, and cell culture supernatants were collected  
171 at 6 hpi. Concentrations of selected cytokines were determined using a custom ProcartaPlex  
172 magnetic bead-based multiplex assay (Thermo Fisher Scientific) on the Luminex MAGPIX<sup>®</sup>  
173 platform according to manufacturer's instructions. CCL12 and CCL3 protein levels were  
174 measured using ELISAs (R&D Systems)

175

### 176 **Statistical Analysis**

177 Statistical analysis was performed on at least three independent experiments using GraphPad  
178 Prism 7.0 software and one-way ANOVA with Tukey's post-test or Student's t-test, and  
179 representative results of triplicate values are shown with standard deviation unless otherwise  
180 noted in the legends. The range of p-values is indicated as follows: \* 0.01<p<0.05; \*\*  
181 0.001<p<0.01, \*\*\* 0.0001<p<0.001, and \*\*\*\* p<0.0001.

182

183 **Results:**

184

185 **IFN- $\beta$  has anti-microbial activity via induction of *Nos2***

186 The analyses of the importance of IFN- $\beta$  for host defense during infection with non-viral  
187 pathogens has proven to be complex since during *in vivo* infections host genetic components,  
188 tissue environment and actual doses of IFN- $\beta$  all can affect outcomes (2, 4, 6). In order to  
189 investigate the importance of IFNAR-signaling we used a reductionist approach by eliminating  
190 bystander cell, host tissue effects and the host cell production of IFN- $\beta$  in response to infection  
191 by using BMDM from *Ifn- $\beta$ <sup>-/-</sup>* mice (25). We infected *Ifn- $\beta$ <sup>-/-</sup>* BMDMs with *Mycobacterium*  
192 *tuberculosis* (Mtb), in the presence or absence of 1ng/mL IFN- $\beta$ . The bacterial burden was  
193 measured every 24 h for a total of 96 h by counting colony forming units (CFUs). During Mtb  
194 infection, we found that reduction in bacterial burden in IFN- $\beta$ -treated cells was minimal at 24  
195 hpi and 48 hpi, but steadily increased between 48 hpi and 96 hpi. At 96 hpi, IFN- $\beta$  treatment  
196 reduced bacterial burden by ~50% (Figure 1A). We also determined that IFN- $\beta$ -treated, Mtb-  
197 infected cells exhibited less necrosis compared to untreated infected cells since an increased  
198 release in gentamycin containing medium could have otherwise accounted for the reduction of  
199 CFU (Figure 1B). These results demonstrate that IFN- $\beta$  treatment promotes host defense  
200 against intracellular microbes during infection of primary macrophages. The direct anti-  
201 microbial activity of IFNAR-signaling on Mtb viability that we show here has not been  
202 demonstrated before in a system in which the infection itself does not produce IFN- $\beta$ .  
203 It was previously shown that type I IFN signaling may lead to the induction of nitric oxide  
204 synthase 2 (*Nos2*) gene expression and subsequent nitric oxide (NO) production infected

205 BMDMs (34). In order to investigate whether NO production plays a role in IFN- $\beta$ -mediated  
206 clearance *ex vivo*, we determined if NOS2 was expressed at time points correlating with the  
207 reduction in bacterial burden during Mtb infection. At 72 hpi, NOS2 was upregulated in Mtb-  
208 infected cells, and NOS2 levels were further increased in Mtb-infected cells stimulated with  
209 IFN- $\beta$  (Figure 1C). At 96 hpi the NOS2 protein levels were decreased compared to 72 hpi,  
210 however there was still a significant upregulation in Mtb-infected cells stimulated with IFN- $\beta$   
211 compared to uninfected cells (Figure 1C). Consequently, we measured NO levels in the  
212 different experimental groups in order to assess the effect of IFN- $\beta$  and infection on NO  
213 production. In Mtb-infected cells treated with 1ng/ml IFN- $\beta$ , we noticed a sharp increase in  
214 nitrite levels which is consistent with the observed increase in NOS2 levels (Figure 1D). We  
215 then investigated whether or not IFN- $\beta$  could promote host resistance in *Nos2*<sup>-/-</sup> BMDMs. We  
216 infected wild-type (WT) or *Nos2*<sup>-/-</sup> BMDMs with Mtb in the presence or absence of 1ng/ml IFN-  
217  $\beta$ . Infected BMDMs showed a significant decrease in CFUs at 96 hpi in IFN- $\beta$  treated cells  
218 (Figure 1E-F). In contrast, we measured no significant decrease in IFN- $\beta$ -treated *Nos2*<sup>-/-</sup>  
219 BMDMs at either 72 hpi or 96 hpi (Fig 1E-F). These results demonstrate that IFN- $\beta$  treatment  
220 promotes host resistance to Mtb via the production of NO at later time points during *ex vivo*  
221 infection.

222

### 223 **Mtb inhibits IFNAR-signaling**

224 Viruses are well known to evade host protective IFN- $\beta$  responses by suppressing  
225 signaling via IFNAR (1, 2). Our results on the host protective effect of IFN- $\beta$  on Mtb infection  
226 prompted us to investigate the potential of Mtb to inhibit IFNAR-signaling. To this purpose we  
227 used a reporter RAW264.7 cell line (Invivogen) which is deficient in *Irf-3* and has an ISG

228 promoter in front of a reporter gene for easy quantification of IFNAR-signaling. We first  
229 determined the capacity of these pathogens to induce activation of the reporter in the absence  
230 of an external IFN- $\beta$  stimulus. Msm, Mtb H37Rv, Mtb CDC1551 did not induce activation of the  
231 ISG reporter in the absence of external stimulation. We also determined that the infection with  
232 the different mycobacterial species does not induce the production of IFN- $\beta$  via ELISA since  
233 these cells are deficient in IRF-3 (not shown). Next, we added increasing amounts of IFN- $\beta$  to  
234 infected or uninfected cells and normalized the response to the response obtained in  
235 uninfected cells (Figure 2A). Overall, both virulent Mtb strains consistently showed about 50-  
236 60% of inhibition whereas infection with Msm had only a minor effect (10-15%) at higher doses  
237 of IFN- $\beta$  (Figure 2A). Notably, this effect was reversed at 1000pg/ml, suggesting there is a limit  
238 to the amount of signaling Mtb can inhibit. To our best knowledge the described experiments  
239 are the first to demonstrate the capacity of Mtb to inhibit IFNAR-signaling. The lack of  
240 investigation into this capacity of the pathogens might be explained by the proposed overall  
241 role of type I IFN in exacerbation of disease outcomes (2, 4-6).

242

### 243 **Mtb affects the type I IFN-stimulated gene host transcriptional profile**

244 Signaling via the IFNAR induces the formation the IFN-stimulated gene factor 3 (ISGF3)  
245 complex and or STAT1:STAT1 homodimerization which both translocate into the nucleus and  
246 bind to ISRE or GAS, respectively, leading to the transcription of hundreds of genes involved in  
247 a variety of immunological functions (3). Consequently, we hypothesized that by inhibiting type  
248 I IFN signaling, Mtb can manipulate the expression of host genes to promote its intracellular  
249 survival. To investigate this, we used RNA sequencing technology (RNAseq) to identify IFN- $\beta$ -  
250 regulated genes that are up- or down-regulated during *Mtb* infection in *Ifn- $\beta$ <sup>-/-</sup>*-derived BMDMs.

251 We analyzed the following experimental groups: 1. uninfected, untreated (UI), 2. uninfected  
252 IFN- $\beta$  treated (UI+) and 3. Mtb H37Rv infected and treated (Mtb+) BMDMs (Table S1). The  
253 RNAseq data was reproducible as indicated by principle component analysis (PCA), hierarchal  
254 clustering and Pearson correlation (Figure S1). All three analyses depicted a satisfactory  
255 degree of clustering between biological replicates with the exception of one outlier  
256 (HPGL0627), which was excluded from further analysis (Figure S1 and Table S1). In order to  
257 identify IFN- $\beta$ -stimulated genes that exhibited differential expression in Mtb-infected BMDMs,  
258 we first characterized all of the IFN- $\beta$ -regulated genes in our experimental system. To that  
259 purpose we compared the gene expression of uninfected, untreated (UI) to uninfected, IFN- $\beta$   
260 treated (UI+) conditions. We identified a total of 1144 IFN- $\beta$ -stimulated genes and 956 genes  
261 with reduces expression ( $> 2$ fold change) (Figure S2A, Table S1). Next, in order to identify all  
262 of the genes that are impacted by Mtb-infection we compared gene expression levels between  
263 the UI +IFN $\beta$  condition and the Mtb H37Rv infected and treated (Mtb+) and found 1296  
264 upregulated and 1294 downregulated ( $> 2$ fold change and an adjusted p-value  $<0.05$ ) genes  
265 (Figure S2B, Table S1). Finally, Mtb-infection causes the deregulation of many genes that are  
266 not regulated by IFN- $\beta$  but will be included in the UI+ versus Mtb+ contrast. The overlap  
267 between these two gene sets was determined to be 309 genes with reduced expression and  
268 170 with increased expression for a total of 479 deregulated genes (Figure S2C, Table S1).  
269 To extend the results of our RNAseq analysis, we determined protein expression and secretion  
270 levels of selected targets in *Ifn- $\beta$ <sup>-/-</sup>* BMDMs infected with Mtb in the presence or absence of  
271 IFN- $\beta$  (Figure 2B). The selection of candidate gene products for follow-up studies was based  
272 on magnitude of deregulation and availability of antibodies (see list of 479 genes in Table S1).  
273 Rnf144A and Rnf144B proteins were not significantly upregulated upon treatment with IFN- $\beta$

274 (Figure 2C) which may reflect a low fold-increase at the RNA level as illustrated in the heatmap  
275 (Figure 2B), however IFI204, IFIT1, MX1 and IIGP1 were strongly induced after treatment with  
276 IFN- $\beta$  (Figure 2C-D). For all targets, we observed some degree of downregulation in IFN- $\beta$ -  
277 treated cells infected with Mtb. In addition, we used ELISA to demonstrate the strong inhibition  
278 of IFN- $\beta$ -driven secretion of CCL12 by Mtb infection (Figure 2E). In conclusion, these data  
279 show a strong correlation of the RNAseq analysis with protein data for the subset of 309 IFN- $\beta$ -  
280 regulated genes that are repressed by Mtb infection (Figure 2B and Table S1). We additionally  
281 investigated some of the 170 genes that were strongly upregulated in the 479 genes set (Table  
282 S1) and characterized several cytokine/chemokine targets using a combination of both  
283 multiplexed and regular ELISA and determined that Mtb infection of BMDMs without addition of  
284 IFN- $\beta$  upregulated secretion levels of all assayed proteins (Figure S3). For IL-1 $\beta$ , TNF $\alpha$  and  
285 CXCL1 there seemed to be additive effected in Mtb +IFN- $\beta$  treated cells when compared to UI  
286 +IFN- $\beta$  alone and Mtb -IFN- $\beta$  mediated cytokine induction, whereas there was an antagonistic  
287 effect of the Mtb-infection for IL-27, IL-1 $\alpha$ , CCL5 and CCL3 suggesting that the induction of  
288 these cytokines in Mtb-infected cells is independent of IFNAR-signaling and that their  
289 upregulation caused by addition of IFN- $\beta$  can be inhibited by Mtb (Figure S1). Overall, this  
290 analysis shows that this subset of 170 of Mtb-deregulated genes after IFN- $\beta$  addition that is  
291 upregulated provides less insights because many of the genes seem to be upregulated by Mtb  
292 infection alone.

293

#### 294 **Mtb inhibits type-I but not type-II IFN-mediated activation of TYK2, JAK1**

295 We discovered that Mtb inhibits signaling via IFNAR and now we investigated further at  
296 what level of the signaling cascade the inhibition occurs. Several viral pathogens have evolved

297 mechanisms to evade the IFN- $\beta$  response by promoting the degradation of IFNAR (35, 36).  
298 We found that surface expression levels of IFNAR1 and IFNAR2 using flow cytometry  
299 remained unchanged by Mtb infection (Figure 3A). After stimulation of IFNAR1/R2 by IFN- $\beta$ ,  
300 the cytosolic protein tyrosine kinases JAK1 and TYK2 are recruited and phosphorylated. We  
301 showed that Mtb-inhibited tyrosine phosphorylation of both TYK2 and JAK1 as early as 20 min  
302 post infection (Figure 3B, 3C). Since JAK1 is involved in both type I and type II interferon  
303 signaling, we also analyzed phosphorylation levels of JAK1 and JAK2, another IFN- $\gamma$ -activated  
304 protein kinase. In IFN- $\gamma$ -treated and Mtb-infected cells there was no significant change in JAK1  
305 or JAK2 phosphorylation levels, showing that the inhibition of JAK1 phosphorylation is specific  
306 to type I IFN signaling (Figure 3D, 3E).

307

### 308 **Mtb inhibits downstream phosphorylation of STAT1 and STAT2**

309 Type I and type II IFNs induce transcription of different subsets of genes but STAT1  
310 phosphorylation occurs in both signaling pathways (3). The canonical signaling pathways are  
311 defined as follows: type I IFN induces the heterodimerization of STAT1 and STAT2, while type  
312 II IFN (IFN- $\gamma$ ) induces homodimerization of STAT1, although type I IFN can also induce STAT1  
313 homodimerization (3). We performed an infection comparing STAT1 tyrosine phosphorylation  
314 levels in IFN- $\beta$ -treated *Ifn- $\beta$ <sup>-/-</sup>* BMDMs infected with virulent Mtb strains H37Rv or strain  
315 CDC1551 and observed that both could similarly inhibit STAT1 phosphorylation, suggesting  
316 that this mechanism of host cell manipulation is shared among virulent Mtb strains (Figure 4A).  
317 We also showed that Mtb did not inhibit IFN- $\gamma$ -dependent phosphorylation of STAT1 (Figure  
318 4B) which is consistent with previously published results (37) and suggest a separate  
319 molecular pathway engaged by Mtb for the inhibition of IFNAR-signaling.

320 Besides STAT1, other STAT isoforms may be stimulated by type I IFN signaling. STAT2  
321 becomes phosphorylated and heterodimerizes with pSTAT1 and IRF9 to form the ISGF3  
322 complex, which translocates into the nucleus to induce transcription of genes containing  
323 interferon stimulated regulatory elements (ISREs) (3). In addition, it has also been shown that  
324 STAT3 can be induced by type I IFNs to regulate transcription of different gene subsets (38).  
325 We discovered that Mtb also inhibited the tyrosine phosphorylation of STAT2 (Figure 4C).  
326 However, Mtb actually induced phosphorylation of STAT3 (Figure 4C). STAT3 phosphorylation  
327 can inhibit type I IFN-mediated signaling, although this occurs at the level of nuclear  
328 translocation (39, 40). Thus, STAT3 activation is most likely not involved in our observed  
329 inhibition of TYK2/JAK1 phosphorylation by Mtb.

330 The levels of IFN- $\beta$  production by mycobacteria-infected cells vary depending on the  
331 mycobacterial species and, in the context of Mtb, the specific strain that is used for the  
332 infection (24, 41, 42). We sought to test if the difference in type I IFNs production observed for  
333 the different mycobacterial species correlated with their variable capacity to inhibit IFNAR-  
334 mediated cell signaling. Here we observed a more modest decrease in the relative STAT1  
335 phosphorylation in cells infected with the vaccine strains *M. bovis* BCG (BCG) and *M. kansasii*  
336 but only a minor reduction upon infection with *M. smegmatis* (Fig 4D). Notably, the capacity of  
337 Mtb to inhibit STAT1 and STAT2 phosphorylation was also reversed upon addition of a high  
338 dose of IFN- $\beta$ , supporting the data using our reporter cell line (Fig 4E-F).

### 339 340 **Mtb infection does not inhibit IFN- $\beta$ signaling in bystander cells**

341 In order to determine whether inhibition of IFN- $\beta$  signaling is specific to Mtb infected  
342 cells, and not due to the secretion of a soluble host factor, we sought to determine if there was



343 an effect in bystander cells. To address this, we used a transwell system in which the upper  
344 transwell was seeded with *Ifn-β*<sup>-/-</sup> BMDMs and the lower transwell was seeded with our ISG  
345 reporter cell line (Fig 5A). The upper transwell was then infected or not with Mtb, and both  
346 wells were stimulated or not with IFN-β as earlier. In this system, a reduction of secreted  
347 luciferase from the cells in the lower transwell would suggest that there is indeed a bystander  
348 effect. In our hands, we saw equal levels of reporter activity in bystander cells exposed to both  
349 uninfected and infected *Ifn-β*<sup>-/-</sup> BMDMs, suggesting that the inhibition is specific to infected  
350 cells (Fig 5B). Western blots of *Ifn-β*<sup>-/-</sup> BMDM lysates (Fig 5C) and the ISG reporter cell line  
351 (Fig 5D) confirm that we do still see inhibition of STAT1 phosphorylation in infected *Ifn-β*<sup>-/-</sup>  
352 cells, however, STAT1 phosphorylation of bystander cells is not affected by the infection status  
353 of the *Ifn-β*<sup>-/-</sup> BMDMs.

354

## 355 Discussion

356 While type I IFN are largely considered to be beneficial in the context of viral infections, their  
357 role during bacterial infections is not completely understood and may vary depending on the  
358 bacterial pathogen and the site of infection. In the context of Mtb infections, type I IFN are  
359 considered to be detrimental to the host, and numerous recent studies have worked toward  
360 better understanding why. Surprisingly, we discovered an anti-microbial effect of type I IFN  
361 during Mtb infection in macrophages via the production of nitric oxide (NO). The role of NO in  
362 host resistance to tuberculosis has been extensively investigated and its bactericidal activity is  
363 attributed to the reactive nitrogen intermediates (RNI) such as NO<sub>2</sub><sup>-</sup>, NO<sub>3</sub><sup>-</sup> and peroxynitrite  
364 (ONOO<sup>-</sup>) (43, 44). Activation of macrophages with IFN-γ was especially powerful in  
365 augmenting RNI-mediated killing of Mtb (45-47). Two recent studies demonstrate that the

366 major host protective role of NO during an *in vivo* infection with Mtb may not be its bactericidal  
367 activity but its immunosuppressive activity leading to reduced host tissue pathology (48, 49).  
368 NO is generated in the cell cytosol by NOS2 and it diffuses rapidly and freely at an estimated  
369 5-10 cell lengths per second (50). This means that during an *in vivo* infection dilution is an  
370 important factor as within 1s the NO concentration has been diluted over 200 times in the NO-  
371 generating cell (50). In addition, the proteasome of Mtb has a role in resistance of the bacteria  
372 to RNI stress (51). It is thus possible that NO levels in the infected cells that actually generate  
373 the NO fail to accumulate to bactericidal threshold levels *in vivo* due to diffusion and dilution as  
374 compared to *ex vivo* infection experiments which are in a closed system and contain mostly  
375 infected cells. In any case, the potential of Mtb to inhibit IFN- $\beta$ -mediated NO production will be  
376 advantageous for the pathogen. We do not believe that the recently reported direct bactericidal  
377 effect of IFN- $\beta$  (52) plays a role in our observed bactericidal effects since otherwise the *Nos2*<sup>-/-</sup>  
378 cells should not be different from wild-type BMDM (Figure 1E).

379  
380 It seems confounding that Mtb would want to both induce IFN- $\beta$  production and simultaneously  
381 inhibit it's signaling. Considering that Mtb is a facultative intracellular pathogen, we  
382 hypothesize that inhibiting type I interferon signaling allows Mtb to mitigate the anti-bacterial  
383 effects of IFN- $\beta$ -induced autocrine signaling (Figure 1). The transcriptome analysis of IFN- $\beta$   
384 regulated genes and their deregulation by Mtb infection suggests that there are some type I  
385 IFN responses that are detrimental to the bacterium during infection. CCL12/MCP-5 is one of  
386 the IFN- $\beta$ -regulated cytokines that is strongly inhibited by Mtb infection at the mRNA and  
387 protein level (Figure 2B, 2E). It is a chemoattractant for monocytes and an agonist of CCR2  
388 (53). Its expression on macrophages is induced by LPS and IFN- $\gamma$  (53). Interestingly, another

389 chemoattractant for monocytes, CCL5, is also upregulated via IFN- $\beta$ -signaling and its  
390 expression is inhibited by Mtb (Figure S3). Consequently, the repression of these chemokines  
391 could lead to a reduction of monocyte recruitment within the Mtb-infected lungs. The type I  
392 IFN-driven expression of chemokines has been shown to be an important signal for  
393 recruitment of bone marrow monocytes to the site of infection with *Listeria monocytogenes*  
394 (54). Among other top down-regulated genes for which we also have confirmed reduced  
395 protein levels are the immunity-related GTPases *Ifi204*, *Ifit1* and *Iigp1* (Figure 2) (55). *IIGP1* is  
396 involved in host defense against *Chlamydia trachomatis* and *Toxoplasma gondii* (56, 57). It is  
397 unlikely that this protein, at least in vivo, is involved in host defense against Mtb since *Iigp1*<sup>-/-</sup>  
398 deficient mice do not have a phenotype (58). *IFI204* is a cytosolic DNA sensor that binds to  
399 extracellular Mtb DNA and induces the cytosolic surveillance pathway via STING/TBK1/IRF3  
400 signaling (17). Consequently, reduction of *IFI204* expression by Mtb will reduce the activation  
401 of IRF3 and its regulon which includes *Ifn- $\beta$*  transcription. This could thus represent an  
402 additional mechanism, in addition to the expression of the phosphodiesterase *CdnP* (23), by  
403 which Mtb regulates IFN- $\beta$  production. Interestingly, *M. bovis* does not inhibit *IFI204*  
404 expression and hence this host cell protein has an important role in host IFN- $\beta$  production for  
405 this mycobacterial species (59). It is important to highlight, though, that the main cytosolic  
406 DNA sensor involved in recognition of Mtb DNA is cGAS (19-21). *IFIT1* has well established  
407 anti-viral activity and is most strongly induced by IFN- $\beta$  (60). Its activity is dependent upon  
408 selective binding of 5'-terminal regions of *cap0*-, *cap1*- and 5'ppp- mRNAs (61) and, hence,  
409 *IFIT1* is an unlikely candidate for functioning in host cell resistance against Mtb infection. The  
410 expression of the *Nos2* gene is not affected by Mtb which we think is due to the early timepoint  
411 (4hpi) selected for the RNAseq analysis. *Nos2* can be induced by signaling via many TLRs and

412 cytokine receptors (43, 62). In our system, Mtb infection causes a strong induction of TNF  
413 secretion which is amplified by addition of IFN- $\beta$  (Figure S3). Consequently, we believe that  
414 TNF is the most likely cause for the observed late induction of NOS2, especially since it has  
415 been noted before that IFN- $\beta$  and TNF synergistically mediate the induction of *Nos2* gene  
416 transcription (43, 62-64).

417

418 The capacity of Mtb to induce activation of STAT3 was recently reported (65) and the  
419 importance for STAT3 activation for virulence of Mtb was recently demonstrate by showing that  
420 deletion of STAT3 in myeloid cells increase resistance of mice to Mtb infection (66). STAT3  
421 phosphorylation can inhibit type I IFN-mediated signaling, although this does not seem to  
422 occur at the level of STAT1/STAT2 phosphorylation but rather at the level of nuclear  
423 translocation (39, 40). Thus, STAT3 activation is likely not involved in our observed inhibition  
424 of TYK2/JAK1 phosphorylation by Mtb. However, we cannot exclude the possibility that Mtb  
425 exerts multiple strategies that synergize to prevent transcription of IFN- $\beta$ -regulated genes and  
426 that STAT3-mediated inhibition may play a role during later time points to sustain the initial  
427 signaling inhibition. The capacity of STAT3 to inhibit *Nos2* gene expression may explain why  
428 NOS2 is only detected after 72h to 96h (Figure 1E). SOCS1, SOCS3, and USP18 are  
429 negative regulators of the IFNAR signaling which are typically induced at a later time point  
430 during IFN- $\beta$  stimulation and serve as negative feedback regulators (3). Considering that our  
431 observed inhibition occurs already as early as 5 min post-infection, albeit an infection period of  
432 4h, it is highly unlikely that the molecular mechanism of at least the early inhibition is  
433 dependent on these common negative regulators. It is known that Mtb possesses several  
434 phosphatases that have been shown to affect the host immune response by interfering with

435 several signal transduction pathways. SapM is a phosphoinositide phosphatase that is  
436 essential in arresting phagosomal maturation by inhibiting phosphatidylinositol 3-phosphate  
437 phosphorylation (67). The tyrosine phosphatase PtpA is also involved inhibiting phagosomal  
438 maturation through inhibition of V-ATPase, and PtpB has been shown to inhibit ERK 1/2 and  
439 p38 signaling cascades (67-69). Although beyond the scope of this study, it would be  
440 interesting to investigate whether these proteins also regulate IFN- $\beta$ -mediated signaling by  
441 directly dephosphorylating TYK2 or JAK1.

442  
443 We here show that Mtb is susceptible to host cell IFNAR-signaling and has evolved to  
444 suppress it. In particular, Mtb inhibits IFNAR-mediated signaling at the level of the receptor-  
445 associated tyrosine kinases JAK1 and TYK2 (Figure 3). Nevertheless, this inhibition can be  
446 overcome by high concentrations of extracellular IFN- $\beta$ , leading to reduced viability of  
447 intracellular Mtb. It is well established that Mtb induces the STING/TBK1/IRF3 signaling axis  
448 via extracellular Mtb DNA (eDNA) (17, 19-21), damage to host cell mitochondria leading to  
449 increase in cytosolic mitochondrial DNA (mtDNA) (24) or secretion of cyclic-di-AMP (c-di-AMP)  
450 (22, 23) (Figure 6). The capacity to produce IFN- $\beta$  is associated with *in vivo* virulence of Mtb  
451 infections in mouse models and human studies (7, 12, 13, 15, 16). The levels of IFN- $\beta$   
452 production by mycobacteria-infected cells vary depending on the mycobacterial species and, in  
453 the context of Mtb, the specific strain that is used for the infection (24, 41, 42). High levels of  
454 IFN- $\beta$  drive production of IL-10 and IL-1Ra (Figure 6) which antagonize the host protective  
455 activity of IL-1 $\beta$  and ultimately lead to increased host tissue destruction which establishes a  
456 replicative niche for Mtb (8). In contrast to the current dogma that Mtb induces production of  
457 type I IFNs in order to support its virulence, multiple studies have provided evidence that in

458 some settings type I IFNs may have detrimental effects on Mtb. For example, *Isg15* is one of  
459 the most highly upregulated genes after type I IFNs stimulation of cells and it has a host  
460 protective role during Mtb infection (70). Furthermore, in the absence of IFN- $\gamma$ , type I IFNs can  
461 promote the activation of macrophages for improved innate host response to Mtb (34). The  
462 strongest evidence for a host protective element in the IFN- $\beta$  response was produced by  
463 showing that *Ifngr*<sup>-/-</sup> *Ifnar*<sup>-/-</sup> double-knock out mice are more susceptible when compared to *Ifn- $\gamma$*   
464 <sup>-/-</sup> mice (6, 34, 71). IFN- $\beta$  is protective during mouse infections against two non-tuberculous  
465 mycobacterial species ( *M. smegmatis* and *M. avium ssp. Paratuberculosis* ) (72). In this  
466 context, it is less surprising that Mtb has also evolved mechanisms to limit production of type I  
467 IFNs, possibly to achieve the “Goldilocks principle”. Overall, Mtb infection causes less  
468 production of IFN- $\beta$  in *ex vivo* infected macrophages when compared to non-tuberculous  
469 mycobacteria (41). Indeed, we have shown previously that Mtb can inhibit *M. smegmatis*-  
470 induced IFN- $\beta$  production in an ESX-1-dependent manner in bone marrow-derived dendritic  
471 cells (BMDCs) (41). There are potentially several mechanisms by which this inhibition occurs.  
472 The Mtb-mediated stimulation of TLR2 inhibits the induction of type I IFNs via TLR7/9  
473 activation (73). In addition, the Mtb phosphodiesterase CdnP can reduce type I IFNs  
474 production by hydrolyzing bacterial-derived c-di-AMP and host-derived cGAMP, thereby  
475 limiting activation of the STING pathway (23). Importantly, this inhibition is relevant for full  
476 virulence of Mtb since a *CdnP* transposon mutant of Mtb is attenuated in mice (23).

477

478 We propose that Mtb has evolved to inhibit autocrine IFN- $\beta$  signaling and its host protective  
479 effects in order to still take advantage of the benefits of paracrine IFN- $\beta$  signaling on uninfected  
480 bystander cells, which is not inhibited by the Mtb-infected cells (Figure 5). This model might

481 explain why in some settings IFN- $\beta$  may be beneficial for the host (6); for example, in the case  
482 of nontuberculous mycobacteria which cannot inhibit IFNAR-mediated signaling (e.g. *M.*  
483 *smegmatis*) and who are susceptible to a host type I IFN response (72).

484

#### 485 **Acknowledgements**

486 We would like to thank the UMD Genomics Core facility for excellent technical assistance. Dr.  
487 Sophie Helaine (Imperial College, London) for advice and editing of manuscript.

488

489

#### 490 **Figure Legends**

491

492

493 **Fig 1. IFN- $\beta$  treatment has a broad anti-microbial activity**

494 (A) *Ifn- $\beta$* <sup>-/-</sup> BMDMs were infected with Mtb H37Rv in the presence or absence of 1000pg/ml  
495 IFN- $\beta$ . The number of bacteria by CFUs in treated conditions relative to untreated cells was  
496 then calculated. (B) Cell necrosis was assayed at each indicated time point using an  
497 adenylate kinase release assay (Toxilight bioassay, Lonza) and is represented as fold change  
498 over untreated infected cells. (C) Whole cell lysates were collected at the indicated timepoints  
499 and immunoblotted for NOS2. Band densities were normalized to GAPDH. (D) Nitrite levels  
500 from culture supernatants were determined using the Griess reagent. (E, F) WT or *Nos2*<sup>-/-</sup>  
501 BMDMs were infected with Mtb H37Rv in the presence or absence of 1000pg/ml IFN- $\beta$ .  
502 Bacterial burden was determined as in Fig. 1A. All data shown are presented as mean  $\pm$   
503 S.E.M. of at least three independent experiments.

504

505 **Fig 2. Mtb inhibits type I IFN signaling**

506 (A) IRF-3 deficient RAW264.7 macrophages transfected with an IFN- $\beta$  responsive  
507 luciferase gene (Invivogen) were infected and treated with the indicated concentrations of IFN-  
508  $\beta$ . After 20hpi the amount of secreted luciferase was quantified. ISG induction is represented  
509 as the fold change in RLU compared to uninfected cells. (B) Heatmap of down-regulated  
510 genes selected for follow-up studies. Log-transformed expression ratios for Mtb + IFN $\beta$ /UI +  
511 IFN- $\beta$  are plotted for each gene. (C-E) *Ifn- $\beta$* <sup>-/-</sup> BMDMs were infected with *M. tuberculosis*  
512 H37Rv (Mtb) and treated with 50 pg/mL IFN- $\beta$  for 4 hours. (C) Whole cell lysates were  
513 collected and immunoblotted for IFI204, IFIT1, Rnf144A, Rnf144B. Band density was



514 normalized to  $\beta$ -actin. (D) Cell lysates were collected and immunoblotted for either MX1,  
515 IIGP1, and normalized to GAPDH. (E) Supernatants were analyzed for levels of CCL12 using  
516 ELISA. All data shown are presented as mean  $\pm$  S.E.M. of at least three independent  
517 experiments.

518

### 519 **Fig 3. Mtb inhibits type-I but not type-II IFN-mediated activation of TYK2 and JAK1**

520 (A) *Ifn- $\beta$* <sup>-/-</sup> BMDMs were infected with Mtb H37Rv and flow cytometry was conducted at 4hpi to  
521 measure surface receptor expression levels of IFNAR1 and IFNAR2. (B and C) *Ifn- $\beta$* <sup>-/-</sup> BMDMs  
522 were infected as described in the presence of 300pg/ml IFN- $\beta$ . Cell lysates were collected at  
523 20 min post infection and immunoblotted for pJAK1 (Y1022/1023), total JAK1, pTYK2  
524 (Y1054/1055), and total TYK2. (D and E) *Ifn- $\beta$* <sup>-/-</sup> BMDMs were infected as described in the  
525 presence of 300pg/ml IFN- $\gamma$ . Cell lysates were collected at 20 min post infection and  
526 immunoblotted for pJAK1 (Y1022/1023), total JAK1, pTYK2 (Y1054/1055), and total TYK2.  
527 Densitometry was performed using ImageJ software and phosphorylated protein bands were  
528 normalized to total signal for each condition. Data and densities shown represent one  
529 representative experiment out of three.

530

### 531 **Fig 4. Mtb inhibits phosphorylation of STAT1 and STAT2**

532 (A-B) *Ifn- $\beta$* <sup>-/-</sup> BMDMs were infected with either Mtb strains H37Rv or CDC1551 and treated with  
533 50pg/ml IFN- $\beta$  (A) or 50pg/ml IFN- $\gamma$  (B). Whole cell lysates were collected at 4 hours post  
534 infection and immunoblotted for pSTAT1 (Y701) and total STAT1. (C) *Ifn- $\beta$* <sup>-/-</sup> BMDMs were  
535 infected with Mtb in the presence or absence of 300pg/ml IFN- $\beta$ . Whole cell lysates were  
536 collected at 20 min post infection and immunoblotted for pSTAT2 (Y690), total STAT2,

537 pSTAT3 (Y705), or total STAT3 as indicated. (D) Cells were infected with the indicated  
538 *Mycobacteria* strains and treated with 50pg/ml IFN- $\beta$ . Whole cell lysates were collected at 4  
539 hours post infection and immunoblotted for pSTAT1 and total STAT1. (E-F) *Ifn- $\beta$ <sup>-/-</sup>* BMDMs  
540 were infected with Mtb and treated with 1ng/ml IFN- $\beta$ . Whole cell lysates were collected at 4  
541 hours post infection and immunoblotted for pSTAT1, total STAT1, pSTAT2 or total STAT2 as  
542 indicated.

543

#### 544 **Fig 5. Mtb does not inhibit type I IFN signaling in bystander cells**

545 (A) Schematic of transwell experiments. (B) Upper transwells were infected or not with Mtb,  
546 and then the upper and lower transwells were treated with 200pg/ml IFN- $\beta$  for 4 hours. Cells in  
547 the lower transwell were lysed by addition of Triton-X-100, and the amount of luciferase was  
548 quantified. (C) Whole cell lysates from the upper transwell of *Ifn- $\beta$ <sup>-/-</sup>* BMDMs were collected at  
549 4hpi and immunoblotted for pSTAT1, total STAT1 or actin as indicated. (D) Whole cell lysates  
550 from the lower transwell were collected at 4hpi and immunoblotted for pSTAT1, total STAT1, or  
551 actin as indicated. UI or Mtb refers to the infection condition of the upper transwell.

552

#### 553 **Fig 6. Overview of type I IFN signaling and production in Mtb-infected cells**

554

555 Mtb induces the production of IFN- $\beta$  in infected cells via release of bacterial DNA (eDNA) (17,  
556 19-22) or damage to host cell mitochondria followed by increased mitochondrial DNA (mtDNA)  
557 in the cytosol (24). All these factors initiate the STING/TBK1 signaling pathway that leads to  
558 activation of the transcription factor IRF-3 and increased IFN- $\beta$  production. The secreted IFN- $\beta$   
559 acts on bystander cells to increase secretion of IL-10 and IL-1Ra which lead to increased host

560 cell necrosis and tissue damage, thus exacerbating the disease outcome (8). Here we show  
561 that Mtb inhibits autocrine IFNAR-signaling which limits not only the production of IFN- $\beta$  but  
562 also the expression of genes with host cell defense properties such as *Nos2*.

563

## 564 References

565

- 566 1. Diamond, M. S., and M. Farzan. 2012. The broad-spectrum antiviral functions of IFIT and  
567 IFITM proteins. *Nat. Rev. Immunol.* 13: 46–57.
- 568 2. McNab, F., K. Mayer-Barber, A. Sher, A. Wack, and A. O’Garra. 2015. Type I interferons in  
569 infectious disease. *Nat. Rev. Immunol.* 15: 87–103.
- 570 3. Ivashkiv, L. B., and L. T. Donlin. 2014. Regulation of type I interferon responses. *Nat. Rev.*  
571 *Immunol.* 14: 36–49.
- 572 4. Boxx, G. M., and G. Cheng. 2016. The Roles of Type I Interferon in Bacterial Infection. *Cell*  
573 *Host and Microbe* 19: 760–769.
- 574 5. Kovarik, P., V. Castiglia, M. Ivin, and F. Ebner. 2016. Type I Interferons in Bacterial  
575 Infections: A Balancing Act. *Front. Immunol.* 7: 307–8.
- 576 6. Moreira-Teixeira, L., K. Mayer-Barber, A. Sher, and A. O’Garra. 2018. Type I interferons in  
577 tuberculosis: Foe and occasionally friend. *J. Exp. Med.* 215: 1273–1285.
- 578 7. Dorhoi, A., V. Yermeev, G. Nouailles, J. Weiner, S. Jörg, E. Heinemann, D. Oberbeck-  
579 Müller, J. K. Knaul, A. Vogelzang, S. T. Reece, K. Hahnke, H.-J. Mollenkopf, V. Brinkmann,  
580 and S. H. E. Kaufmann. 2014. Type I IFN signaling triggers immunopathology in tuberculosis-  
581 susceptible mice by modulating lung phagocyte dynamics. *Eur. J. Immunol.* 44: 2380–2393.
- 582 8. Mayer-Barber, K. D., B. B. Andrade, S. D. Oland, E. P. Amaral, D. L. Barber, J. Gonzales, S.  
583 C. Derrick, R. Shi, N. P. Kumar, W. Wei, X. Yuan, G. Zhang, Y. Cai, S. Babu, M. Catalfamo, A.  
584 M. Salazar, L. E. Via, C. E. Barry, and A. Sher. 2014. Host-directed therapy of tuberculosis  
585 based on interleukin-1 and type I interferon crosstalk. *Nature* 511: 99–103.
- 586 9. Mayer-Barber, K. D., B. B. Andrade, D. L. Barber, S. Hieny, C. G. Feng, P. Caspar, S.  
587 Oland, S. Gordon, and A. Sher. 2011. Innate and adaptive interferons suppress IL-1 $\alpha$  and IL-  
588 1 $\beta$  production by distinct pulmonary myeloid subsets during Mycobacterium tuberculosis  
589 infection. *Immunity* 35: 1023–1034.
- 590 10. Novikov, A., M. Cardone, R. Thompson, K. Shenderov, K. D. Kirschman, K. D. Mayer-  
591 Barber, T. G. Myers, R. L. Rabin, G. Trinchieri, A. Sher, and C. G. Feng. 2011. Mycobacterium  
592 tuberculosis triggers host type I IFN signaling to regulate IL-1 $\beta$  production in human  
593 macrophages. *J. Immunol.* 187: 2540–2547.
- 594 11. Maertzdorf, J., D. Repsilber, S. K. Parida, K. Stanley, T. Roberts, G. Black, G. Walzl, and  
595 S. H. E. Kaufmann. 2010. Human gene expression profiles of susceptibility and resistance in  
596 tuberculosis. *Genes Immun* 12: 15–22.

- 597 12. Berry, M. P. R., C. M. Graham, F. W. McNab, Z. Xu, S. A. A. Bloch, T. Oni, K. A. Wilkinson,  
598 R. Banchereau, J. Skinner, R. J. Wilkinson, C. Quinn, D. Blankenship, R. Dhawan, J. J. Cush,  
599 A. Mejias, O. Ramilo, O. M. Kon, V. Pascual, J. Banchereau, D. Chaussabel, and A. O'Garra.  
600 2010. An interferon-inducible neutrophil-driven blood transcriptional signature in human  
601 tuberculosis. *Nature* 466: 973–977.
- 602 13. Antonelli, L. R. V., A. Gigliotti Rothfuchs, R. Gonçalves, E. Roffê, A. W. Cheever, A. Bafica,  
603 A. M. Salazar, C. G. Feng, and A. Sher. 2010. Intranasal Poly-IC treatment exacerbates  
604 tuberculosis in mice through the pulmonary recruitment of a pathogen-permissive  
605 monocyte/macrophage population. *J. Clin. Invest.* 120: 1674–1682.
- 606 14. Ordway, D., M. Henao-Tamayo, M. Harton, G. Palanisamy, J. Troudt, C. Shanley, R. J.  
607 Basaraba, and I. M. Orme. 2007. The hypervirulent *Mycobacterium tuberculosis* strain HN878  
608 induces a potent TH1 response followed by rapid down-regulation. *J. Immunol.* 179: 522–531.
- 609 15. Stanley, S. A., J. E. Johndrow, P. Manzanillo, and J. S. Cox. 2007. The Type I IFN  
610 response to infection with *Mycobacterium tuberculosis* requires ESX-1-mediated secretion and  
611 contributes to pathogenesis. *J. Immunol.* 178: 3143–3152.
- 612 16. Manca, C., L. Tsenova, A. Bergtold, S. Freeman, M. Tovey, J. M. Musser, C. E. Barry, V.  
613 H. Freedman, and G. Kaplan. 2001. Virulence of a *Mycobacterium tuberculosis* clinical isolate  
614 in mice is determined by failure to induce Th1 type immunity and is associated with induction  
615 of IFN- $\alpha$ / $\beta$ . *Proc. Natl. Acad. Sci. U.S.A.* 98: 5752–5757.
- 616 17. Manzanillo, P. S., M. U. Shiloh, D. A. Portnoy, and J. S. Cox. 2012. *Mycobacterium*  
617 tuberculosis activates the DNA-dependent cytosolic surveillance pathway within macrophages.  
618 *Cell Host and Microbe* 11: 469–480.
- 619 18. Watson, R. O., P. S. Manzanillo, and J. S. Cox. 2012. Extracellular *M. tuberculosis* DNA  
620 targets bacteria for autophagy by activating the host DNA-sensing pathway. *Cell* 150: 803–  
621 815.
- 622 19. Wassermann, R., M. F. Gulen, C. Sala, S. G. Perin, Y. Lou, J. Rybniker, J. L. Schmid-  
623 Burgk, T. Schmidt, V. Hornung, S. T. Cole, and A. Ablasser. 2015. *Mycobacterium tuberculosis*  
624 Differentially Activates cGAS- and Inflammasome-Dependent Intracellular Immune Responses  
625 through ESX-1. *Cell Host and Microbe* 17: 799–810.
- 626 20. Watson, R. O., S. L. Bell, D. A. MacDuff, J. M. Kimmey, E. J. Diner, J. Olivas, R. E. Vance,  
627 C. L. Stallings, H. W. Virgin, and J. S. Cox. 2015. The Cytosolic Sensor cGAS Detects  
628 *Mycobacterium tuberculosis* DNA to Induce Type I Interferons and Activate Autophagy. *Cell*  
629 *Host and Microbe* 17: 811–819.
- 630 21. Collins, A. C., H. Cai, T. Li, L. H. Franco, X.-D. Li, V. R. Nair, C. R. Scharn, C. E. Stamm,  
631 B. Levine, Z. J. Chen, and M. U. Shiloh. 2015. Cyclic GMP-AMP Synthase Is an Innate  
632 Immune DNA Sensor for *Mycobacterium tuberculosis*. *Cell Host and Microbe* 17: 820–828.
- 633 22. Dey, B., R. J. Dey, L. S. Cheung, S. Pokkali, H. Guo, J.-H. Lee, and W. R. Bishai. 2015. A  
634 bacterial cyclic dinucleotide activates the cytosolic surveillance pathway and mediates innate  
635 resistance to tuberculosis. *Nat. Med.* 21: 401–406.
- 636 23. Dey, R. J., B. Dey, Y. Zheng, L. S. Cheung, J. Zhou, D. Sayre, P. Kumar, H. Guo, G.  
637 Lamichhane, H. O. Sintim, and W. R. Bishai. 2017. Inhibition of innate immune cytosolic  
638 surveillance by an *M. tuberculosis* phosphodiesterase. *Nat Chem Biol* 13: 210–217.
- 639 24. Wiens, K. E., and J. D. Ernst. 2016. The Mechanism for Type I Interferon Induction by  
640 *Mycobacterium tuberculosis* is Bacterial Strain-Dependent. *PLoS Pathog* 12: e1005809–20.

- 641 25. Deonarain, R., A. Alcamí, M. Alexiou, M. J. Dallman, D. R. Gewert, and A. C. G. Porter.  
642 2000. Impaired Antiviral Response and Alpha/Beta Interferon Induction in Mice Lacking Beta  
643 Interferon. *Journal of Virology* 74: 3404–3409.
- 644 26. Srinivasan, L., S. A. Gurses, B. E. Hurley, J. L. Miller, P. C. Karakousis, and V. Briken.  
645 2016. Identification of a Transcription Factor That Regulates Host Cell Exit and Virulence of  
646 *Mycobacterium tuberculosis*. *PLoS Pathog* 12: e1005652.
- 647 27. Bolger, A. M., M. Lohse, and B. Usadel. 2014. Trimmomatic: a flexible trimmer for Illumina  
648 sequence data. *Bioinformatics* 30: 2114–2120.
- 649 28. Yates, A., W. Akanni, M. R. Amodé, D. Barrell, K. Billis, D. Carvalho-Silva, C. Cummins, P.  
650 Clapham, S. Fitzgerald, L. Gil, C. G. Girón, L. Gordon, T. Hourlier, S. E. Hunt, S. H. Janacek,  
651 N. Johnson, T. Juettemann, S. Keenan, I. Lavidas, F. J. Martin, T. Maurel, W. McLaren, D. N.  
652 Murphy, R. Nag, M. Nuhn, A. Parker, M. Patricio, M. Pignatelli, M. Rahtz, H. S. Riat, D.  
653 Sheppard, K. Taylor, A. Thormann, A. Vullo, S. P. Wilder, A. Zadissa, E. Birney, J. Harrow, M.  
654 Muffato, E. Perry, M. Ruffier, G. Spudich, S. J. Trevanion, F. Cunningham, B. L. Aken, D. R.  
655 Zerbino, and P. Flicek. 2016. Ensembl 2016. *Nucleic Acids Research* 44: D710–D716.
- 656 29. Kim, D., G. Pertea, C. Trapnell, H. Pimentel, R. Kelley, and S. L. Salzberg. 2013. TopHat2:  
657 accurate alignment of transcriptomes in the presence of insertions, deletions and gene fusions.  
658 *Genome Biol.* 14: R36.
- 659 30. Anders, S., P. T. Pyl, and W. Huber. 2015. HTSeq—a Python framework to work with high-  
660 throughput sequencing data. *Bioinformatics* 31: 166–169.
- 661 31. Gentleman, R. C., V. J. Carey, D. M. Bates, B. Bolstad, M. Dettling, S. Dudoit, B. Ellis, L.  
662 Gautier, Y. Ge, J. Gentry, K. Hornik, T. Hothorn, W. Huber, S. Iacus, R. Irizarry, F. Leisch, C.  
663 Li, M. Maechler, A. J. Rossini, G. Sawitzki, C. Smith, G. Smyth, L. Tierney, J. Y. H. Yang, and  
664 J. Zhang. 2004. Bioconductor: open software development for computational biology and  
665 bioinformatics. *Genome Biol.* 5: R80.
- 666 32. Law, C. W., Y. Chen, W. Shi, and G. K. Smyth. 2014. voom: Precision weights unlock  
667 linear model analysis tools for RNA-seq read counts. *Genome Biol.* 15: R29.
- 668 33. Leek, J. T., W. E. Johnson, H. S. Parker, A. E. Jaffe, and J. D. Storey. 2012. The sva  
669 package for removing batch effects and other unwanted variation in high-throughput  
670 experiments. *Bioinformatics* 28: 882–883.
- 671 34. Moreira-Teixeira, L., J. Sousa, F. W. McNab, E. Torrado, F. Cardoso, H. Machado, F.  
672 Castro, V. Cardoso, J. Gaifem, X. Wu, R. Appelberg, A. G. Castro, A. O'Garra, and M. Saraiva.  
673 2016. Type I IFN Inhibits Alternative Macrophage Activation during *Mycobacterium*  
674 *tuberculosis* Infection and Leads to Enhanced Protection in the Absence of IFN- $\gamma$  Signaling. *J.*  
675 *Immunol.* 197: 4714–4726.
- 676 35. Evans, J. D., R. A. Crown, J. A. Sohn, and C. Seeger. 2011. West Nile virus infection  
677 induces depletion of IFNAR1 protein levels. *Viral Immunol.* 24: 253–263.
- 678 36. Xia, C., M. Vijayan, C. J. Pritzl, S. Y. Fuchs, A. B. McDermott, and B. Hahm. 2015.  
679 Hemagglutinin of Influenza A Virus Antagonizes Type I Interferon (IFN) Responses by Inducing  
680 Degradation of Type I IFN Receptor 1. *Journal of Virology* 90: 2403–2417.
- 681 37. Ting, L. M., A. C. Kim, A. Cattamanchi, and J. D. Ernst. 1999. *Mycobacterium tuberculosis*  
682 inhibits IFN-gamma transcriptional responses without inhibiting activation of STAT1. *J.*  
683 *Immunol.* 163: 3898–3906.
- 684 38. Villarino, A. V., Y. Kanno, and J. J. O'Shea. 2017. Mechanisms and consequences of Jak–  
685 STAT signaling in the immune system. *Nat Immunol* 18: 374–384.

- 686 39. Ho, H. H., and L. B. Ivashkiv. 2006. Role of STAT3 in Type I Interferon Responses. *J. Biol.*  
687 *Chem.* 281: 14111–14118.
- 688 40. Wang, W.-B., Wang, W. B., D. E. Levy, D. E. Levy, C. K. Lee, and C.-K. Lee. 2011. STAT3  
689 Negatively Regulates Type I IFN-Mediated Antiviral Response. *J. Immunol.* 187: 2578–2585.
- 690 41. Shah, S., A. Bohsali, S. E. Ahlbrand, L. Srinivasan, V. A. K. Rathinam, S. N. Vogel, K. A.  
691 Fitzgerald, F. S. Sutterwala, and V. Briken. 2013. Cutting edge: Mycobacterium tuberculosis  
692 but not nonvirulent mycobacteria inhibits IFN- $\beta$  and AIM2 inflammasome-dependent IL-1 $\beta$   
693 production via its ESX-1 secretion system. *J. Immunol.* 191: 3514–3518.
- 694 42. Manca, C., L. Tsenova, S. Freeman, A. K. Barczak, M. Tovey, P. J. Murray, C. Barry III,  
695 and G. Kaplan. 2005. Hypervirulent M. tuberculosis W/Beijing strains upregulate type I IFNs  
696 and increase expression of negative regulators of the Jak-Stat pathway. *J. Interferon Cytokine*  
697 *Res.* 25: 694–701.
- 698 43. MacMicking, J., Q. W. Xie, and C. Nathan. 1997. Nitric oxide and macrophage function.  
699 *Annu. Rev. Immunol.* 15: 323–350.
- 700 44. Jamaati, H., E. Mortaz, Z. Pajouhi, G. Folkerts, M. Movassaghi, M. Moloudizargari, I. M.  
701 Adcock, and J. Garssen. 2017. Nitric Oxide in the Pathogenesis and Treatment of  
702 Tuberculosis. *Front Microbiol* 8: 436–11.
- 703 45. Flesch, I. E., and S. H. Kaufmann. 1991. Mechanisms involved in mycobacterial growth  
704 inhibition by gamma interferon-activated bone marrow macrophages: role of reactive nitrogen  
705 intermediates. *Infection and Immunity* 59: 3213–3218.
- 706 46. Denis, M. 1991. Interferon-gamma-treated murine macrophages inhibit growth of tubercle  
707 bacilli via the generation of reactive nitrogen intermediates. *Cell. Immunol.* 132: 150–157.
- 708 47. Chan, J., Y. Xing, R. S. Magliozzo, and B. R. Bloom. 1992. Killing of virulent  
709 Mycobacterium tuberculosis by reactive nitrogen intermediates produced by activated murine  
710 macrophages. *J. Exp. Med.* 175: 1111–1122.
- 711 48. Mishra, B. B., R. R. Lovewell, A. J. Olive, G. Zhang, W. Wang, E. Eugenin, C. M. Smith, J.  
712 Y. Phuah, J. E. Long, M. L. Dubuke, S. G. Palace, J. D. Goguen, R. E. Baker, S. Nambi, R.  
713 Mishra, M. G. Booty, C. E. Baer, S. A. Shaffer, V. Dartois, B. A. McCormick, X. Chen, and C.  
714 M. Sasseti. 2017. Nitric oxide prevents a pathogen-permissive granulocytic inflammation  
715 during tuberculosis. *Nature Microbiology* 1–11.
- 716 49. Mishra, B. B., V. A. K. Rathinam, G. W. Martens, A. J. Martinot, H. Kornfeld, K. A.  
717 Fitzgerald, and C. M. Sasseti. 2012. Nitric oxide controls the immunopathology of tuberculosis  
718 by inhibiting NLRP3 inflammasome-dependent processing of IL-1 $\beta$ . *Nat Immunol* 14: 52–60.
- 719 50. Thomas, D. D., L. A. Ridnour, J. S. Isenberg, W. Flores-Santana, C. H. Switzer, S.  
720 Donzelli, P. Hussain, C. Vecoli, N. Paolocci, S. Ambs, C. A. Colton, C. C. Harris, D. D.  
721 Roberts, and D. A. Wink. 2008. The chemical biology of nitric oxide: implications in cellular  
722 signaling. *Free Radical Biology and Medicine* 45: 18–31.
- 723 51. Darwin, K. H., S. Ehrh, J.-C. Gutierrez-Ramos, N. Weich, and C. F. Nathan. 2003. The  
724 proteasome of Mycobacterium tuberculosis is required for resistance to nitric oxide. *Science*  
725 302: 1963–1966.
- 726 52. Kaplan, A., M. W. Lee, A. J. Wolf, J. J. Limon, C. A. Becker, M. Ding, R. Murali, E. Y. Lee,  
727 G. Y. Liu, G. C. L. Wong, and D. M. Underhill. 2017. Direct Antimicrobial Activity of IFN- $\beta$ . *J.*  
728 *Immunol.* 198: 4036–4045.
- 729 53. Sarafi, M. N., E. A. Garcia-Zepeda, J. A. MacLean, I. F. Charo, and A. D. Luster. 1997.  
730 Murine monocyte chemoattractant protein (MCP)-5: a novel CC chemokine that is a structural  
731 and functional homologue of human MCP-1. *J. Exp. Med.* 185: 99–109.

- 732 54. Jia, T., I. Leiner, G. Dorothee, K. Brandl, and E. G. Pamer. 2009. MyD88 and Type I  
733 interferon receptor-mediated chemokine induction and monocyte recruitment during *Listeria*  
734 *monocytogenes* infection. *J. Immunol.* 183: 1271–1278.
- 735 55. Kim, B.-H., J. D. Chee, C. J. Bradfield, E.-S. Park, P. Kumar, and J. D. MacMicking. 2016.  
736 Interferon-induced guanylate-binding proteins in inflammasome activation and host defense.  
737 *Nat Immunol* 17: 481–489.
- 738 56. Martens, S., I. Parvanova, J. Zerrahn, G. Griffiths, G. Schell, G. Reichmann, and J. C.  
739 Howard. 2005. Disruption of *Toxoplasma gondii* Parasitophorous Vacuoles by the Mouse p47-  
740 Resistance GTPases. *PLoS Pathog* 1: e24–15.
- 741 57. Al-Zeer, M. A., H. M. Al-Younes, P. R. Braun, J. Zerrahn, and T. F. Meyer. 2009. IFN- $\gamma$ -  
742 Inducible Irga6 Mediates Host Resistance against *Chlamydia trachomatis* via Autophagy.  
743 *PLoS ONE* 4: e4588–13.
- 744 58. Liesenfeld, O., I. Parvanova, J. Zerrahn, S.-J. Han, F. Heinrich, M. Muñoz, F. Kaiser, T.  
745 Aebischer, T. Buch, A. Waisman, G. Reichmann, O. Utermöhlen, E. von Stebut, F. D. von  
746 Loewenich, C. Bogdan, S. Specht, M. Saefel, A. Hoerauf, M. M. Mota, S. Könen-Waisman, S.  
747 H. E. Kaufmann, and J. C. Howard. 2011. The IFN- $\gamma$ -Inducible GTPase, Irga6, Protects Mice  
748 against *Toxoplasma gondii* but Not against *Plasmodium berghei* and Some Other Intracellular  
749 Pathogens. *PLoS ONE* 6: e20568–12.
- 750 59. Chunfa, L., S. Xin, L. Qiang, S. Sreevatsan, L. Yang, D. Zhao, and X. Zhou. 2017. The  
751 Central Role of IFI204 in IFN- $\beta$  Release and Autophagy Activation during *Mycobacterium bovis*  
752 Infection. *Front Cell Infect Microbiol* 7: 169.
- 753 60. Fensterl, V., and G. C. Sen. 2015. Interferon-induced Ifit proteins: their role in viral  
754 pathogenesis. *Journal of Virology* 89: 2462–2468.
- 755 61. Kumar, P., T. R. Sweeney, M. A. Skabkin, O. V. Skabkina, C. U. T. Hellen, and T. V.  
756 Pestova. 2014. Inhibition of translation by IFIT family members is determined by their ability to  
757 interact selectively with the 5'-terminal regions of cap0-, cap1- and 5'ppp- mRNAs. *Nucleic*  
758 *Acids Research* 42: 3228–3245.
- 759 62. Bogdan, C. 2001. Nitric oxide and the immune response. *Nat Immunol* 2: 907–916.
- 760 63. Farlik, M., B. Reutterer, C. Schindler, F. Greten, C. Vogl, M. Müller, and T. Decker. 2010.  
761 Nonconventional initiation complex assembly by STAT and NF-kappaB transcription factors  
762 regulates nitric oxide synthase expression. *Immunity* 33: 25–34.
- 763 64. Bachmann, M., Z. Waibler, T. Pleli, J. Pfeilschifter, and H. Mühl. 2017. Type I Interferon  
764 Supports Inducible Nitric Oxide Synthase in Murine Hepatoma Cells and Hepatocytes and  
765 during Experimental Acetaminophen-Induced Liver Damage. *Front. Immunol.* 8: 75–11.
- 766 65. Queval, C. J., O.-R. Song, N. Deboosère, V. Delorme, A.-S. Debie, R. Iantomasi, R.  
767 Veyron-Churlet, S. Jouny, K. Redhage, G. Deloison, A. Baulard, M. Chamaillard, C. Locht, and  
768 P. Brodin. 2016. STAT3 Represses Nitric Oxide Synthase in Human Macrophages upon  
769 *Mycobacterium tuberculosis* Infection. *Sci. Rep.* 1–14.
- 770 66. Gao, Y., J. I. Basile, C. Classon, D. Gavier-Widen, A. Yoshimura, B. Carow, and M. E.  
771 Rottenberg. 2018. STAT3 expression by myeloid cells is detrimental for the T- cell-mediated  
772 control of infection with *Mycobacterium tuberculosis*. *PLoS Pathog* 14: e1006809.
- 773 67. Wong, D., J. D. Chao, and Y. Av-Gay. 2013. *Mycobacterium tuberculosis*-secreted  
774 phosphatases: from pathogenesis to targets for TB drug development. *Trends in microbiology*  
775 21: 100–109.
- 776 68. Zhou, B., Y. He, X. Zhang, J. Xu, Y. Luo, Y. Wang, S. G. Franzblau, Z. Yang, R. J. Chan,  
777 Y. Liu, J. Zheng, and Z.-Y. Zhang. 2010. Targeting *mycobacterium* protein tyrosine

- 778 phosphatase B for antituberculosis agents. *Proceedings of the National Academy of Sciences*  
779 107: 4573–4578.
- 780 69. Wong, D., H. Bach, J. Sun, Z. Hmama, and Y. Av-Gay. 2011. Mycobacterium tuberculosis  
781 protein tyrosine phosphatase (PtpA) excludes host vacuolar-H<sup>+</sup>-ATPase to inhibit phagosome  
782 acidification. *Proceedings of the National Academy of Sciences* 108: 19371–19376.
- 783 70. Kimmey, J. M., J. A. Campbell, L. A. Weiss, K. J. Monte, D. J. Lenschow, and C. L.  
784 Stallings. 2017. The impact of ISGylation during Mycobacterium tuberculosis infection in mice.  
785 *Microbes Infect.*
- 786 71. Desvignes, L., A. J. Wolf, and J. D. Ernst. 2012. Dynamic roles of type I and type II IFNs in  
787 early infection with Mycobacterium tuberculosis. *J. Immunol.* 188: 6205–6215.
- 788 72. Ruangkiattikul, N., A. Nerlich, K. Abdissa, S. Lienenklaus, A. Suwandi, N. Janze, K.  
789 Laarmann, J. Spanier, U. Kalinke, S. Weiss, and R. Goethe. 2017. cGAS-STING-TBK1-IRF3/7  
790 induced interferon- $\beta$  contributes to the clearing of non tuberculous mycobacterial infection in  
791 mice. *Virulence* 8: 1–13.
- 792 73. Liu, Y. C., D. P. Simmons, X. Li, D. W. Abbott, W. H. Boom, and C. V. Harding. 2012.  
793 TLR2 signaling depletes IRAK1 and inhibits induction of type I IFN by TLR7/9. *J. Immunol.*  
794 188: 1019–1026.
- 795



# Figure 1

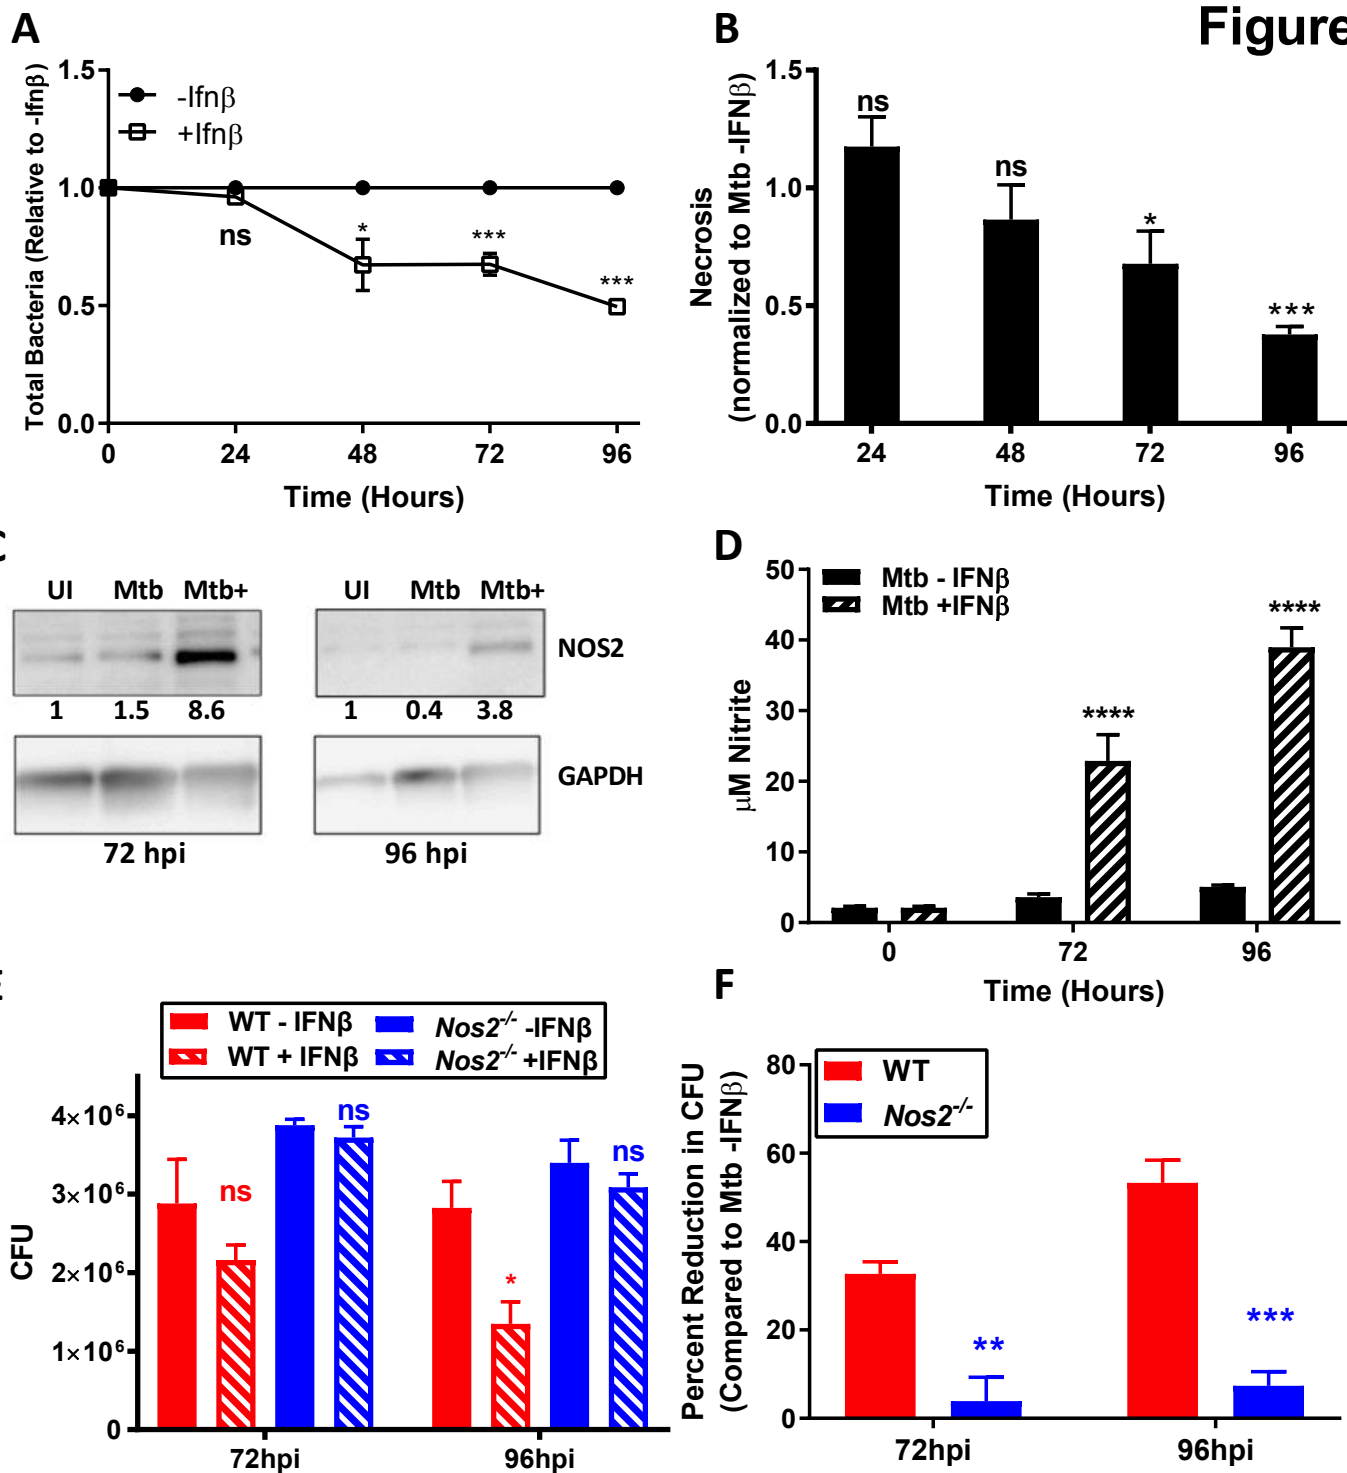

A

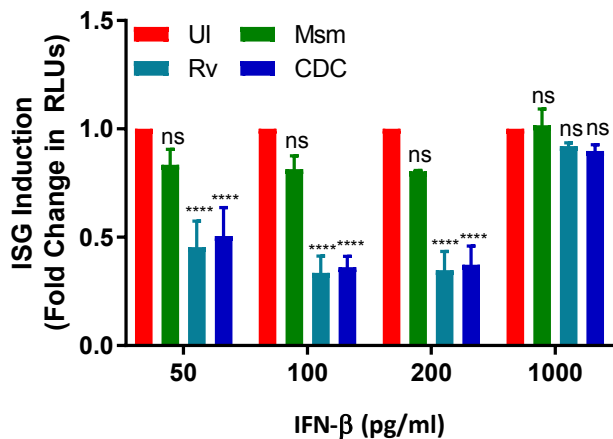

B

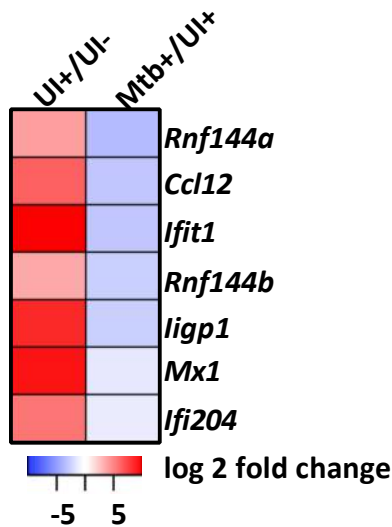

C

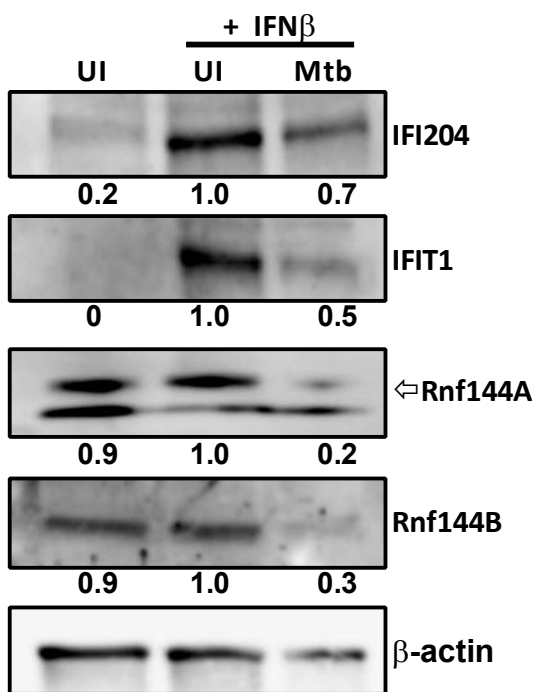

D

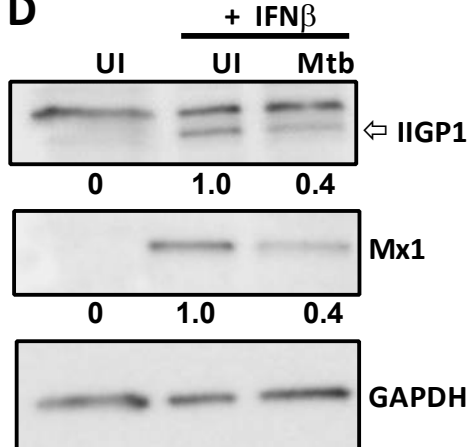

E

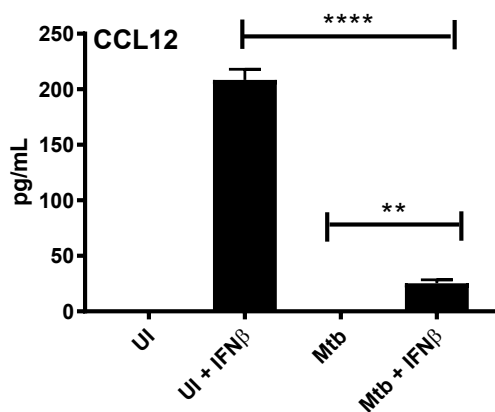

**Figure 3****A**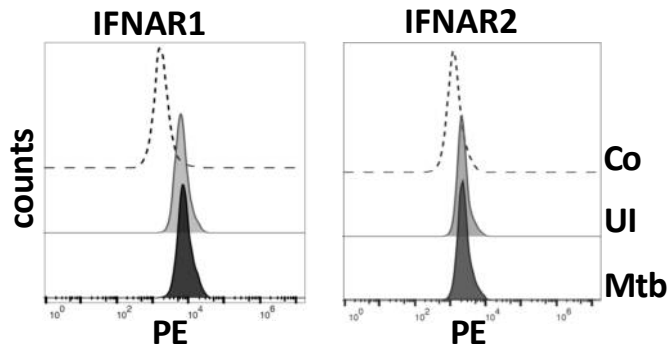**B**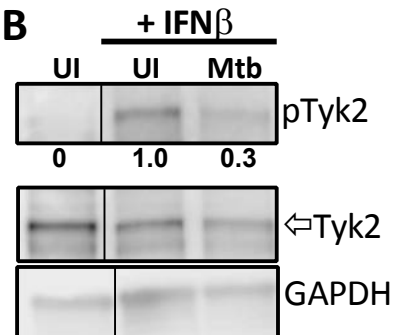**C**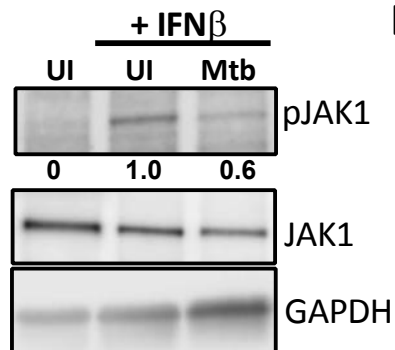**D**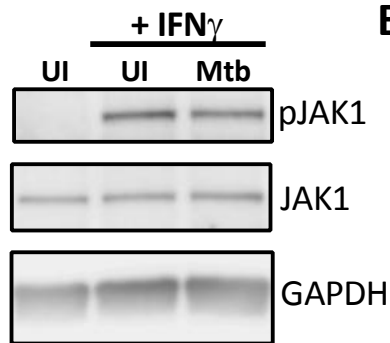**E**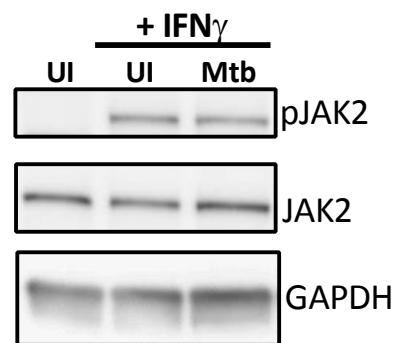

**Figure 4**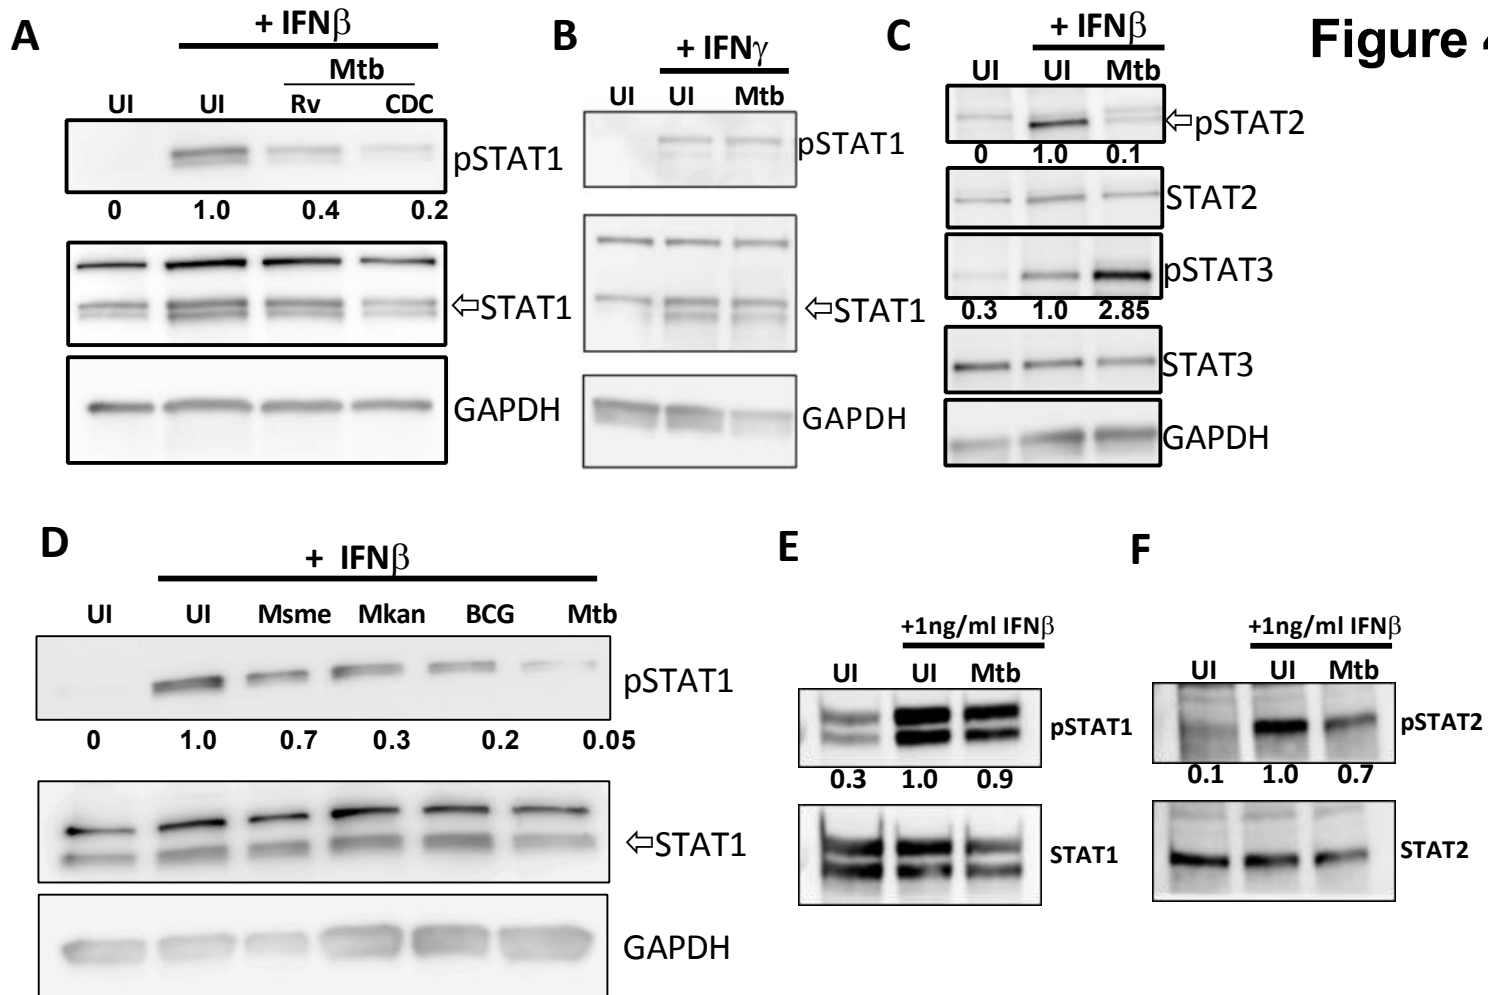

# Figure 5

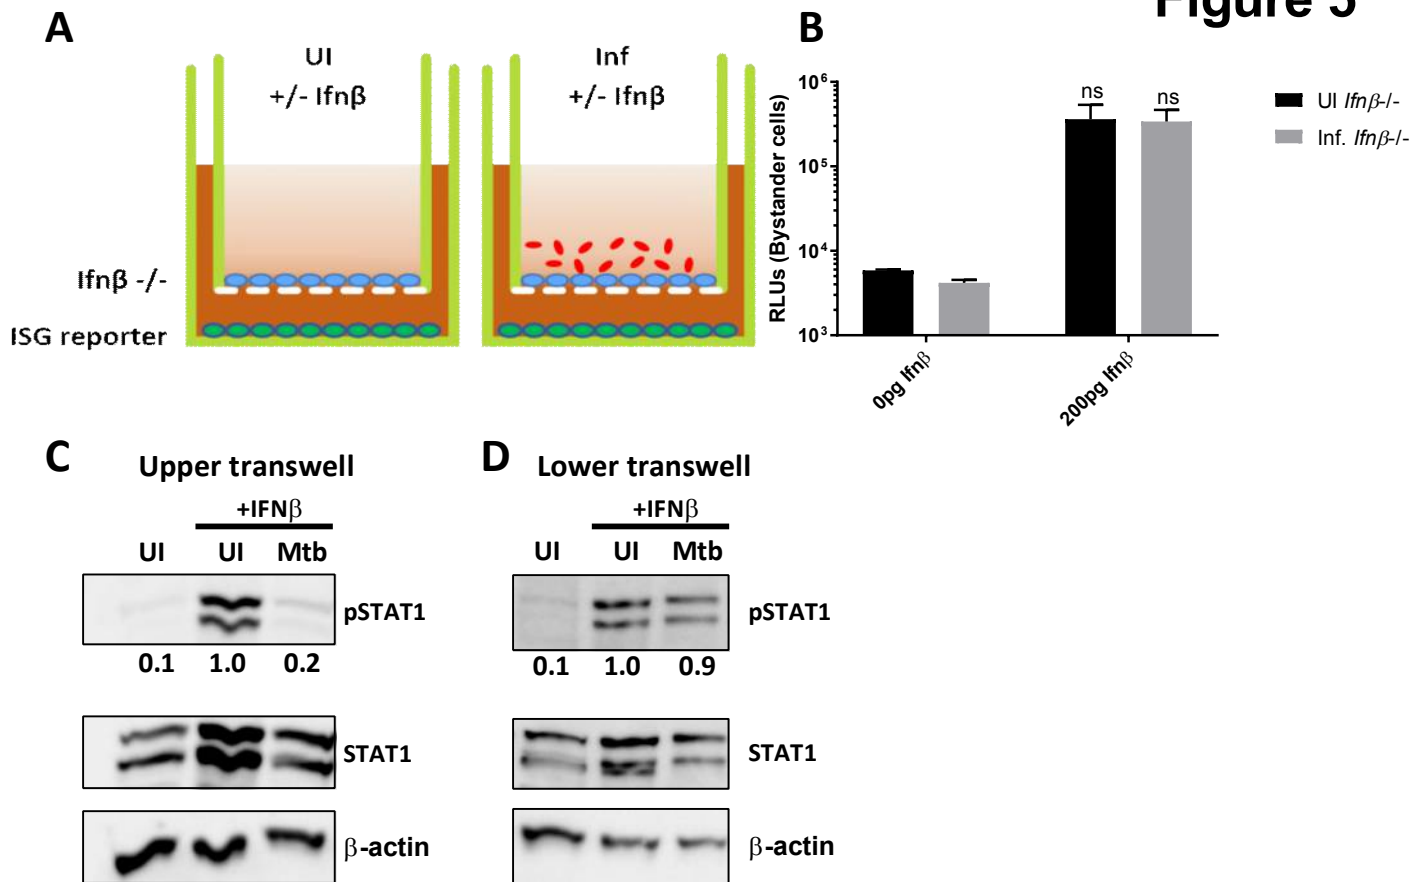

Figure 6

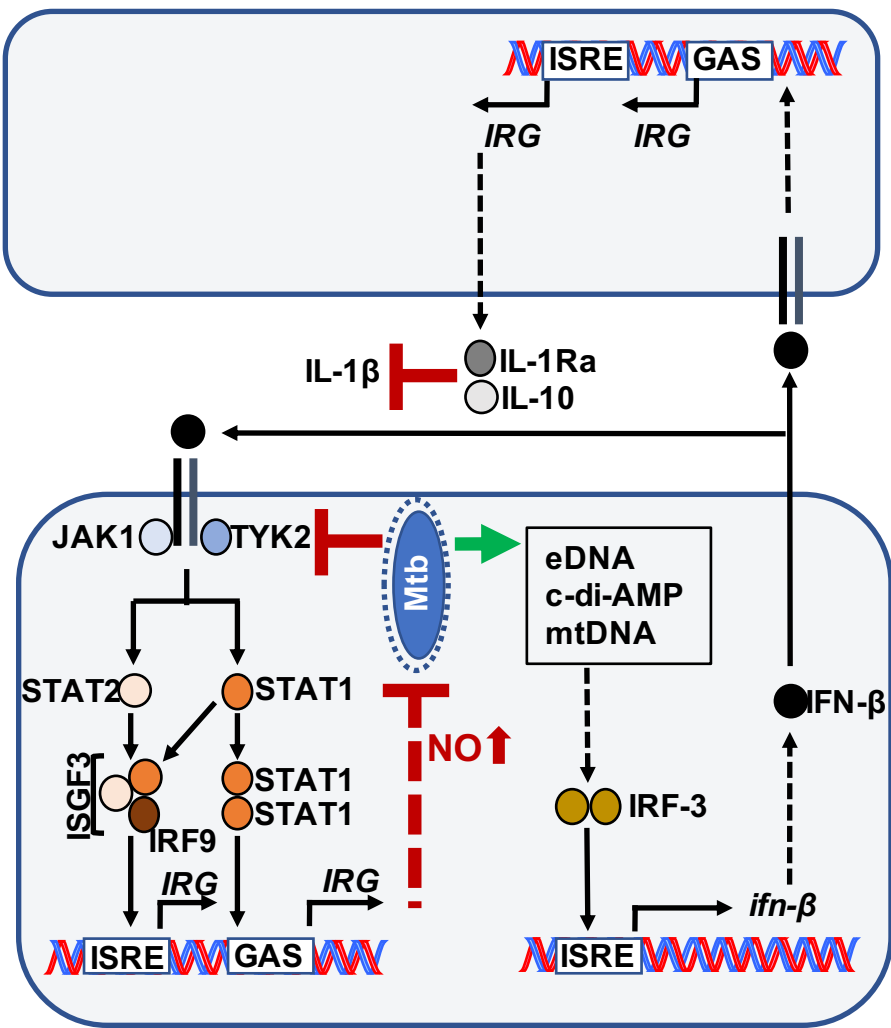

Source: https://biorxiv.org/content/biorxiv/early/2018/09/26/425116.full-text.pdf
